# Supplementary material for: The parabrachial to central amygdala pathway is critical to injury-induced pain sensitization in mice
Source: PubMed Central journal article supplement (PMC10789863; doi:10.1038/s41386-023-01673-6), 2023-08-04
Supplement: 41386_2023_1673_MOESM1_ESM.pdf [file 41386_2023_1673_MOESM1_ESM.pdf]

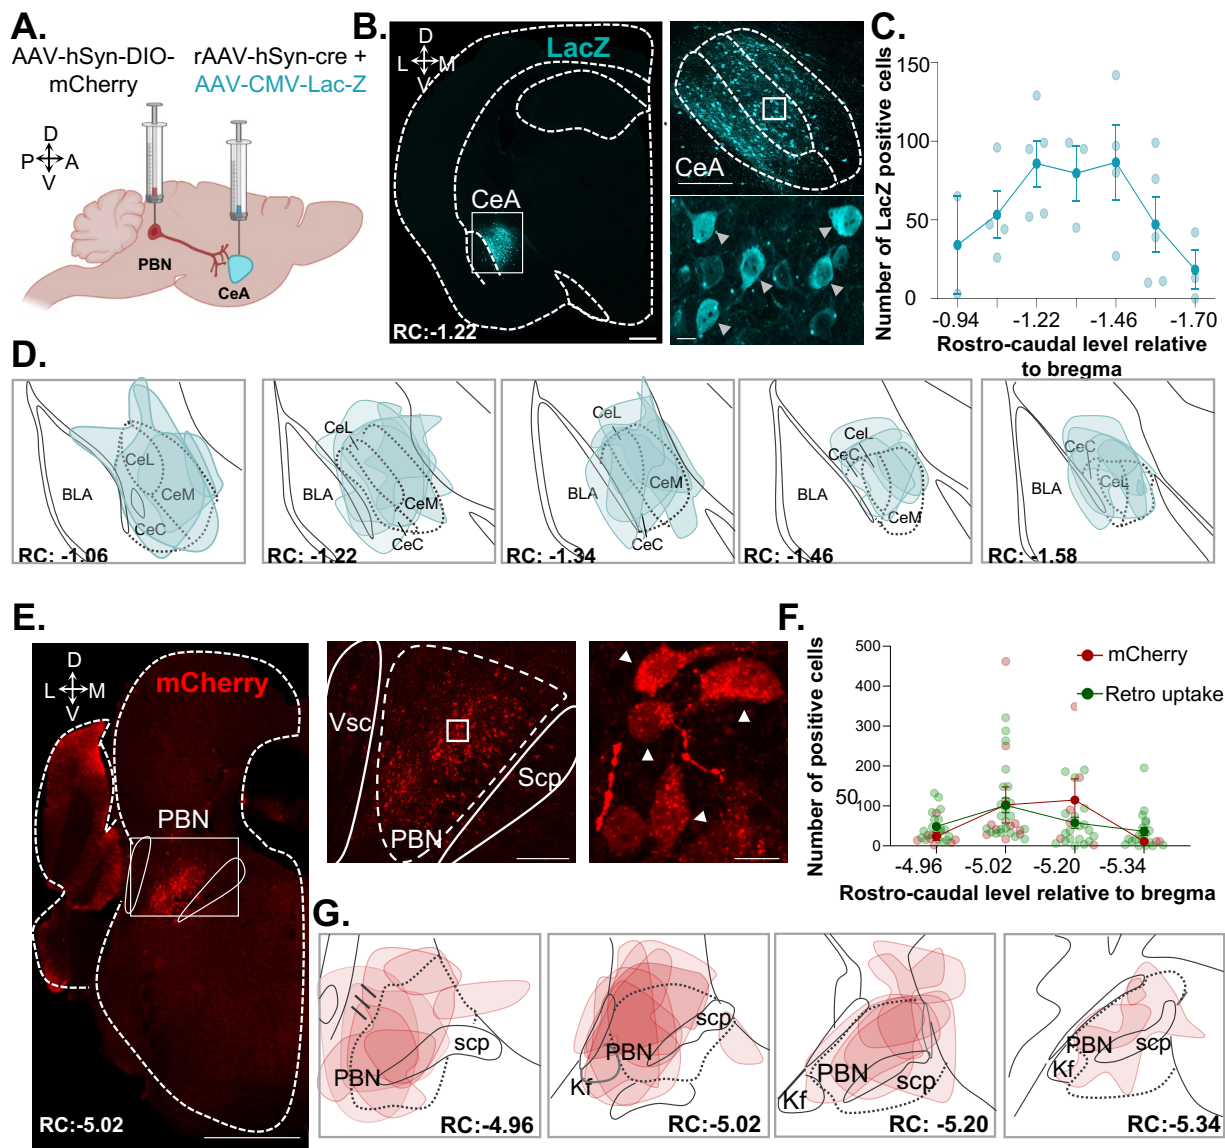

1 **Supplementary:**

2 **Figure S1: Validation of intersectional genetic approach. (A)** Schematic of

3 intersectional approach. Male C57BL/6J mice were stereotaxically co-injected with AAV8-

4 hSyn-DIO-mcherry into the right PBN and with a mix (1:1) of AAV.hSyn.HI.eGFP-Cre and

5 pAAV.CMV.LacZ.bGH into the right CeA. **(B)** Representative images of the

6 pAAV.CMV.LacZ.bGH injection into the CeA in a coronal brain slice. Immunofluorescence

7 for LacZ is shown in cyan. Left panel shows low magnification image. Scale bar

8 represents 500  $\mu$ m. Right panel shows high magnification images of area delineated by

9 the white box. Scale bar for the top panel represents 200  $\mu$ m and 10  $\mu$ m for the bottom.

10 Arrows represent transduced cells. Rostro-caudal level relative to bregma is -1.22. **(C)**

11 Number of LacZ transduced cells by rostro-caudal distribution (n=4 mice and four to six

12 slices per mouse). **(D)** Drawings showing the rostro-caudal distribution of the

13 pAAV.CMV.LacZ.bGH injection into the CeA. **(E)** Representative images of the AAV8-

14 hSyn-DIO-mcherry injection into the PBN in a coronal brain slice. Immunofluorescence

15 for mCherry is shown in red. Left panel shows low magnification image. Scale bar

16 represents 500  $\mu$ m. Middle and left panels show high magnification images of area

17 delineated by white box. Arrows represent transduced cells. Scale bar for the middle

18 panel represents 200  $\mu$ m and 10  $\mu$ m for the left. RC is -4.96. **(F)** Number of cells with

19 retrograde uptake following AAV.hSyn.HI.eGFP-Cre injection and mCherry-transduced

20 cells by RC. n=10 mice for mCherry and n=25 mice for retrograde uptake; 2-4 slices per

21 mouse. All data is presented as means  $\pm$  SEM. **(G)** Drawings showing the rostro-caudal

22 distribution of the AAV8-hSyn-DIO injection into the PBN. Abbreviations: superior

23 cerebellar peduncle (scp), parabrachial nucleus (PBN), central amygdala (CeA), central

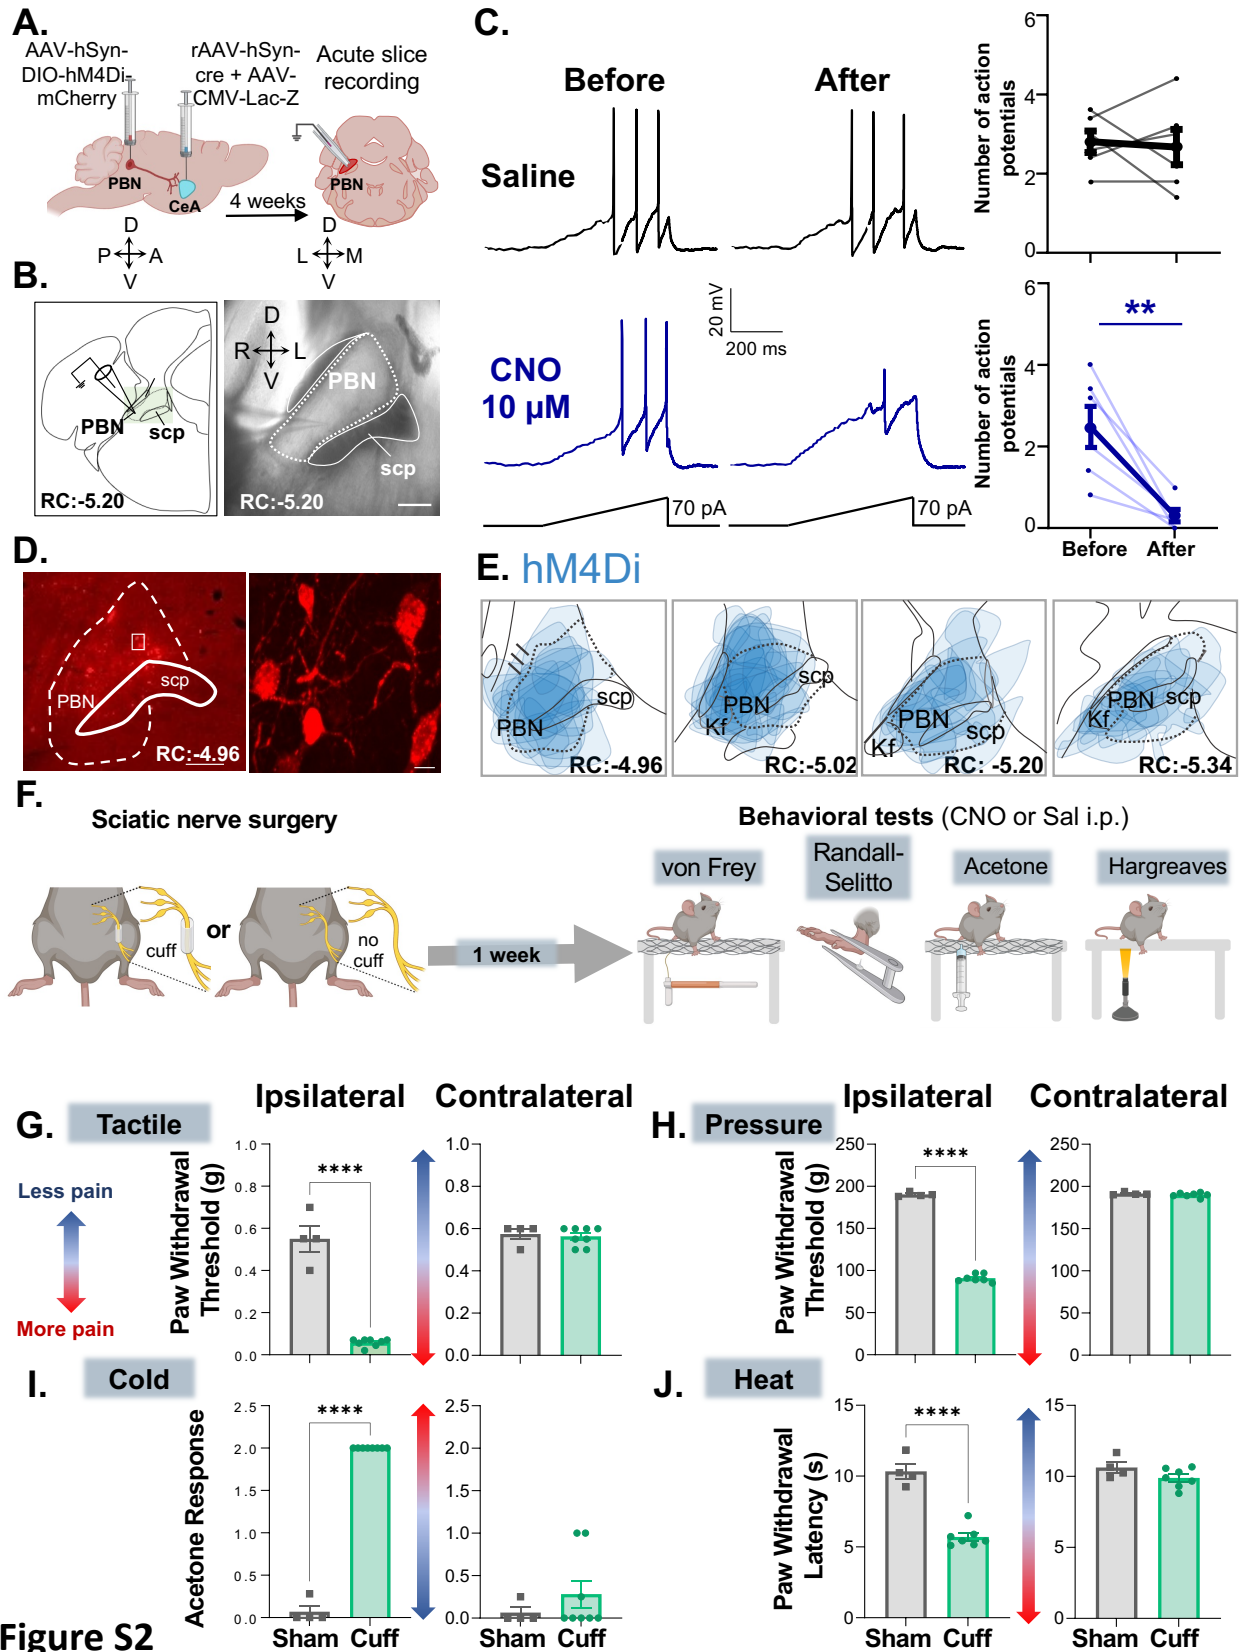

538

Figure S2

539

24 amygdala medial (CeM), central amygdala lateral (CeL), central amygdala capsular  
25 (CeC), basolateral amygdaloid (BLA).

26

27 **Figure S2: Validation of chemogenetic intersectional approach and behavioral**

28 **assays. (A)** Timeline of acute slice electrophysiology experiments. Male C57BL/6J mice

29 were stereotaxically injected with AAV8-hSyn-DIO-hMD4i into the PBN and

30 AAV.hSyn.HI.eGFP-Cre into the CeA. Acute slice recordings were obtained from hMD4i-

31 transduced PBN neurons 4 weeks after the injection. **(B)** Left panel: schematic description

32 (left) and representative differential interference contrast image (right) of coronal brain

33 slice with recording electrode in PBN. Scale bar represents 150  $\mu$ m. RC: -5.20. **(C)**

34 Representative voltage traces of recordings obtained from hMD4i-transduced PBN

35 neurons in response to depolarizing current injections before (left) and after (right) bath

36 application of saline (top) or 10  $\mu$ M CNO (bottom). Number of action potentials before and

37 after bath applications. n=6 cells per treatment. Paired two tailed t test; \*\*p<0.01. **(D)**

38 Representative image of the AAV8-hSyn-DIO-hMD4i injection into the PBN in a coronal

39 brain slice. Immunofluorescence for mCherry is shown in red. Left panel shows a low

40 magnification image and right panel a high magnification of RC: -4.96. Scale bar for left

41 panel is 125  $\mu$ M and 10  $\mu$ M for right panel. **(E)** Drawings showing the rostro-caudal

42 distribution of AAV8-hSyn-DIO-hMD4i injection into the PBN. **(F)** Experimental timeline of

43 behavioral experiments. Sciatic nerve cuff or sham surgery was performed in male

44 C57BL/6J mice. Following 1 week of recovery, von Frey, Randall-Selitto, Acetone and

45 Hargreaves tests were used to address sensitivity to tactile, pressure, cold and heat

46 stimulation, respectively, in the hind paws ipsilateral and contralateral to cuff treatment.

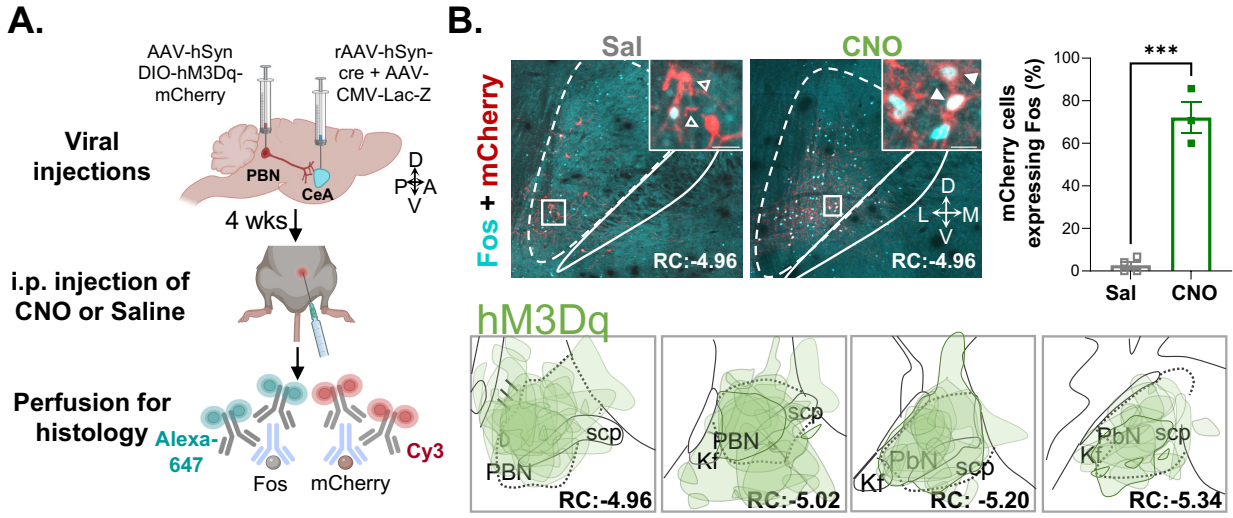

47 **(G-J)** Paw withdrawal threshold after tactile **(G)** pinch **(H)** stimulation, acetone response  
48 score **(I)** and withdrawal latency after heat stimulation **(J)** of the hind paw ipsilateral or  
49 contralateral to sham and cuff treatments. n=4 mice for sham and n=8 mice for cuff in all  
50 tests. Unpaired two tailed t test; \*\*\*\*p<0.0001. Individual mice are represented by scatter  
51 points. Abbreviations: ventral spinocerebellar tract (vsc), superior cerebellar peduncle  
52 (scp), Kölliker-Fuse nucleus (kf). All data is presented as means ± SEM.

53

54 **Figure S3: Validation of CNO-mediated activation of CeA-projecting PBN neurons**

55 **(A)** Timeline of chemogenetic activation validation. Male C57BL/6J mice were  
56 stereotaxically injected with AAV8-hSyn-DIO-hMD3q into the right PBN and a mix (1:1)  
57 of AAV.hSyn.HI.eGFP-Cre and pAAV.CMV.LacZ.bGH into the right CeA. 4 weeks after,  
58 mice were intraperitoneally injected with either CNO or saline and perfused 30-45mins  
59 after for immunohistology purposes. **(B)** Representative images of PBN slices of  
60 stereotaxically injected mice after saline (left) and CNO (right) i.p. injections.  
61 Immunofluorescence for mCherry (representing hM3Dq-transduced cells) is shown in red  
62 and for Fos in cyan color. Insets: solid arrows represent mCherry+ cells colocalized with  
63 Fos while open arrows represent mCherry+ only cells. Scale bar represents 150 µm for  
64 low magnification and 10 µm for insets. RC for both pictures: -4.96. Right panel shows  
65 mean ± SEM percentage of mCherry+ cells expressing c-Fos. n=4 mice for saline, n=3  
66 mice for CNO; 4 slices per mouse. Unpaired two tailed t test; \*\*\*p<0.001. Bottom panel  
67 shows drawings of the rostro-caudal distribution of the AAV8-hSyn-DIO-hMD3q injection  
68 into the PBN.

69

70

## 71 **Materials and Methods**

### 72 **Subjects**

73 Experiments were approved by the Animal Care and Use Committee of the National  
74 Institute of Neurological Disorders and Stroke and the National Institute on Deafness and  
75 other Communication Disorders with the guidance from the National Institutes of Health  
76 (NIH). Adult C57BL/6J or Swiss Webster mice between the age of 8 to 17 weeks old, bred  
77 in house or purchased from Jackson Laboratory, were used for all behavioral and  
78 histological experiments. The sex of the mice used for each experiment is described in  
79 the sections below. The following mouse lines were used for electrophysiology  
80 experiments: heterozygous *Prkcd*-cre mice (GENSAT – founder line 011559-UCD) or  
81 heterozygous male *Sst*-cre (Jackson Laboratory – founder line 018973) crossed with  
82 homozygous *Ai9* mice (Jackson Laboratories – founder line 007909). Offspring mice were  
83 genotyped for cre-recombinase using tail biopsies and PCR (Transnetyx) with the  
84 following primers: TTAATCCATATTGGCAGAACGAAAACG (forward) and  
85 CAGGCTAAGTGCCTTCTCTACA (reverse). The expression and fidelity of Cre in Som+  
86 and PKC $\delta$ + neurons have been previously described [1,2]. Mice were initially group  
87 housed (up to 5 mice per cage) with littermates of the same sex in a vivarium with  
88 controlled humidity and temperature under reversed 12 h light/dark cycle (9 pm to 9 am  
89 light). Following surgery, pairs of littermate mice of the same sex and pain treatment were  
90 transferred to new home cages with perforated Plexiglass dividers to keep one mouse  
91 per side. All behavioral tests were performed under red light during the dark period,  
92 between the hrs of 10 am and 6 pm. Mice received one handling session per day for at  
93 least 5 days before the start of behavioral and electrophysiological experiments as

94 previously described [3]. During each handling session, mice were allowed to move freely  
95 on the hands of the experimenter for approximately 5-8 min and were then injected with  
96 50-100 µl saline intraperitoneally (i.p.). On the first surgery day, animals from the same  
97 litter were randomly assigned to experimental groups (i.e., brain injection and sciatic  
98 nerve treatments). All subsequent experiments and analyses were performed blind to  
99 experimental treatment.

100

### 101 **Stereotaxic injections**

102 Acute microinjections were performed using a small animal stereotaxic instrument (David  
103 Kopf Instruments). Male and female C57BL/6J and Swiss Webster mice were initially  
104 anesthetized with 5% isoflurane in preparation for the stereotaxic surgery. After induction,  
105 mice were maintained with 2% isoflurane at a flow rate of 0.5 L/min for the duration of  
106 surgery. A hand warmer (Hot Rods Hand Warmers) was used for thermal maintenance  
107 during the procedure. Stereotaxic injections were performed using 0.5 µl Hamilton Neuros  
108 32-gauge syringes (Neuro model 7000.5 KH) at a flow rate of 0.1 µl/min. The syringe was  
109 left in place for an additional 15 min to allow for diffusion of virus and to prevent backflow.

110       Based on previous literature demonstrating hemispheric lateralization of CeA  
111 function in the modulation of hypersensitivity, [4-7] stereotaxic injections were performed  
112 in the right hemisphere in all experiments. For intersectional chemogenetic experiments,  
113 the CeA of C57BL/6J or Swiss Webster mice was injected with either 0.05 µl of  
114 pENN.AAV.hSyn.HI.eGFP-Cre.WPRE.SV40 (Addgene 105540-AAVrg) or 0.07 µl of a 1:1  
115 mixture of pENN.AAV.hSyn.HI.eGFP-Cre.WPRE.SV40 (Addgene 105540-AAVrg) and  
116 pAAV.CMV.LacZ.bGH (Addgene 105531-AAV8). During the same surgery, the PBN was



117 injected with 0.1  $\mu$ l of AAV8-hSyn-DIO-hM4D(Gi)-mCherry (Addgene 44362-AAV8) or  
118 AAV8-hSyn-DIO-mcherry (Addgene 50459-AAV8) or AAV8-hSyn-DIO-hM3D(Gq)-  
119 mCherry (Addgene 44361-AAV8). The position of specific brain regions relative to  
120 bregma, midline and surface of the skull has been shown to be strain specific [8]. For this  
121 reason, optimal coordinates for specific brain regions per strain were determined by  
122 injecting Evans Blue dye. Correct targeting was assessed based on dye location using  
123 distinctive anatomical landmarks and a mouse brain atlas for both the CeA and the PBN.

124 The following stereotaxic coordinates were used to target the CeA in C57BL/6J  
125 mice: 1.25 mm posterior from bregma, 2.95 mm lateral to midline, 4.5 mm ventral to skull  
126 surface. PBN injections were performed using the following stereotaxic coordinates: 4.9  
127 mm posterior from bregma, 1.2 mm lateral to midline, 3.78 mm ventral to skull surface.  
128 To target the CeA in Swiss Webster mice, the following coordinates were used: 1.4 mm  
129 posterior from bregma, 3.2 mm lateral to midline and 4.8 mm ventral to skull surface. For  
130 PBN injections the following coordinates were used: 5.0 mm posterior to bregma, 1.3  
131 lateral to midline and 3.52 mm ventral to skull surface. Mice recovered for 3 weeks before  
132 additional experimental procedures. At the end of the experiments, mice were  
133 transcardially perfused with 4% paraformaldehyde solution in 0.1 M Phosphate Buffer  
134 (PFA/PB), pH 7.4. Injection sites were verified through histology and only animals with  
135 correct injection sites were included in the analyses.

136 For CeA slice electrophysiology experiments, 0.1  $\mu$ l of rAAV1-hSyn-  
137 hChR2(H134R)-EYFP- (Addgene 26973) was injected into the right PBN of *Sst-cre::Ai9*  
138 or *Prkcd-cre::Ai9* mice. Injections were performed using the following stereotaxic  
139 coordinates for *Prkcd-cre::Ai9*: 5.2 mm posterior from bregma, 1.3 mm lateral to midline,

140 3.52 mm ventral to skull surface. For *Sst-cre::Ai9* mice coordinates were: 5.1 mm  
141 posterior from bregma, 1.2 mm lateral to midline, 3.78 mm ventral to skull surface.  
142 Electrophysiology experiments were performed at least 4 weeks after viral injection to  
143 allow for expression of ChR2 in PBN terminals in the CeA.

144 For PBN slice electrophysiology experiments, 0.22  $\mu$ l of red or green Retrobeads™  
145 IX (Lumafluor Inc) were stereotaxically injected into the right CeA of male C57/BL6J mice  
146 using the following coordinates: 1.25 posterior from bregma, 2.95 lateral to midline, and -  
147 4.85 ventral to skull surface. These animals received concurrent sciatic cuff implantation  
148 in the right sciatic nerve, described in the following section.

149

### 150 **Sciatic cuff implantation**

151 Sciatic nerve surgeries were performed 3 weeks after stereotaxic surgeries as described  
152 [9,10]. Male and female C57BL/6J or male Swiss Webster mice from the same litter were  
153 randomly assigned to either cuff or sham surgeries such that pairs of co-housed mice  
154 underwent the same manipulation. Mice were anesthetized with 2% isoflurane at a flow  
155 rate of 0.5 L/min and an incision 1 cm long was made in the proximal one third of the left  
156 lateral thigh. The sciatic nerve was exposed and gently stretched with forceps inserted  
157 under the nerve. The cuff group was implanted with a 2-mm-long piece of PE-20 non-  
158 toxic sterile polyethylene tubing (0.38 mm ID / 1.09 mm OD; Daigger Sci) that was split  
159 along its side and slid onto the exposed sciatic nerve. After cuff implantation, the nerve  
160 was returned to the thigh. For sham animals, the sciatic nerve was exposed and gently  
161 stretched using forceps and then returned to its normal position. The skin was closed with  
162 wound clips (Reflex Clips, World Precision Instruments). Mice recovered for at least a

163 one-week before undergoing behavioral testing. Wound clips were not actively removed  
164 during the experiment to minimize stress, discomfort, and pain during behavior testing  
165 days (7-12 days after sciatic nerve surgery). All experiments were replicated at least  
166 twice.

167

### 168 **Nociceptive testing**

169 Male and female mice were used for nociceptive testing. Testing on males and females  
170 was performed separately. Behavioral experiments were not directly powered to detect  
171 sex differences, but no overt sex differences were observed. Thus, data from both sexes  
172 were pooled and individual data points for each sex are clearly identified in all scatter  
173 plots. Experimenter was blind to treatment for all behavioral testing and every cohort was  
174 counterbalanced to include mice from all experimental groups. Testing was performed on  
175 two consecutive days per test. On each testing day, baseline (pre-injection)  
176 measurements were taken. Saline or Clozapine-N-oxide (CNO, Enzo Life Sciences,  
177 Farmingdale, NY) was injected i.p. (10 mg/kg body weight for hM4Di mice or 3 mg/kg  
178 body weight for hM3Dq) and a second measurement (post-injection) was taken 30  
179 minutes to 45 minutes after the i.p. injection. Mice were randomly assigned into control  
180 (saline) or experimental (CNO) group on the first day of each test. The next day, the tests  
181 were performed with the opposite treatment. The order of i.p. injections was  
182 counterbalanced in these experiments. The von Frey and acetone evaporative tests were  
183 performed on the same day, waiting 30 minutes between tests, and 7-8 days after the  
184 cuff implantation. Heat sensitivity test was performed 9-10 days after cuff implantation

185 and the Randall-Selitto test for pressure sensitivity on days 11-12. Testing boxes for all  
186 tests were 11 × 11 × 13 cm, ventilated and made of opaque Plexiglas (custom-made).

#### 187 *von Frey test*

188 Mice were habituated (for 3 h) to testing chambers placed on an elevated mesh platform  
189 (custom-made) prior to behavioral assessment. von Frey filaments (North Coast Medical,  
190 Inc. San Jose, CA) were used to measure sensitivity to tactile stimulation as described  
191 [11]. Starting with the smallest filament, each von Frey filament, was applied to the mouse  
192 hind paws until bent at 30° for ~2 s. The smallest filament that elicited a paw withdrawal  
193 response in at least three of five trials was taken as the paw withdrawal threshold for that  
194 trial. The average of 3-5 measurements was calculated individually for each paw and  
195 used as the withdrawal threshold.

#### 196 *Acetone evaporative test*

197 An adapted acetone evaporative test [12] was used to measure sensitivity to a cold  
198 stimulus. An acetone drop was formed at the top of a 1 ml or 3 ml syringe then lightly  
199 applied through the wire mesh to the plantar surface of the hind paw ipsilateral (treated)  
200 or contralateral (untreated) to sciatic nerve surgery. Following acetone application,  
201 nociceptive responses were scored based on responses observed for 60 s post  
202 application. A modified version of the scoring system described for this test [13] was used,  
203 with 0 = a rapid transient lifting, licking, or shaking of the hind paw, which subsides  
204 immediately; 1 = lifting, licking, and/or shaking of the hind paw, that continues beyond the  
205 initial application, but fades within 5 s; 2 = protracted, repeated lifting, licking, and/or  
206 shaking of the hind paw. The average score of 3-5 stimulations were taken from and used  
207 for each hind paw.

208 *Hargreaves test*

209 A modified version of the Hargreaves test [14] and the Plantar Analgesia Meter (IITC Life  
210 Sciences, Woodland Hills, CA) was used to measure heat sensitivity as described [15].  
211 Animals were habituated for 1 hr to a Plexiglas testing chamber on an elevated platform  
212 with a clear glass surface heated to 30°C. The thermal stimulus was a constant radiant  
213 heat source with an active intensity of 25 for C57BL/6J or 32 for Swiss Webster mice  
214 directed to the hind paw plantar surface. Active intensity is the intensity of light source as  
215 defined by the manufacturer. The time each mouse needed to withdraw the hind paw was  
216 recorded. A 15-second cutoff was used to prevent injury. The average of five withdrawal  
217 latencies were taken from and used for each hind paw.

218 *Randall-Selitto test*

219 A modified Randall-Selitto test [16] and the Digital Paw Pressure Randall-Selitto meter  
220 (IITC Life Sciences, Woodland Hills, CA) was used to measure response thresholds to  
221 mechanical pressure stimuli in deep tissue. This is an assay developed and traditionally  
222 used in physically restrained rats as mice rarely tolerate such handling [17-21]. To avoid  
223 potential unwanted effects of restraining in our experiments, male or female mice were  
224 lightly anesthetized with 3% isoflurane in an induction chamber, then maintained with  
225 0.5%–1% isoflurane at a flow rate of 0.5 L/min. A sharp pinch not exceeding 200 g of  
226 force was delivered to the plantar surface of the paw ipsilateral and contralateral to cuff  
227 or sham implanted sciatic nerve. Pinch pressure for withdrawal was recorded and the  
228 average of five trials per hind paw was calculated individually for each animal.

229 *Formalin test*

230 Male and female C57BL/6J or male Swiss Webster mice were habituated for 1 hr in  
231 plexiglass testing chambers on an elevated platform with transparent floors. A mirror was  
232 positioned directly below the chambers to properly visualize mice hind paws. After  
233 habituation, mice received i.p. injection of either CNO (10 mg/kg) or saline and were  
234 immediately returned to the testing chamber. The experimenter was blind to treatment.  
235 30-40 minutes after i.p. injection, C57BL/6J mice were injected with 10  $\mu$ l of 2-3% formalin  
236 and Swiss Webster with 10  $\mu$ l of 5% formalin into either left or right hind paws.  
237 Immediately after, they were returned to the testing chambers and time spent in  
238 nociceptive behaviors, defined as licking, lifting, and shaking the hind paws, were  
239 individually measured for 40 min (C57BL/6J) or 60 min (Swiss Webster) in 5 min intervals.  
240 Total time spent in spontaneous nociceptive behaviors was defined as the sum of the  
241 time spent in the individual behaviors. Phase 1 of the formalin test was defined as the first  
242 five minutes post-formalin injection and phase 2 was measured from 5 to 40 min after  
243 formalin injection. Sensitivity to tactile stimulation was measured in male Swiss Webster  
244 mice one day after formalin injection using von Frey filaments as described above.

245

## 246 **Immunohistochemistry**

247 At the end of the experiments, mice were deeply anesthetized with 1.25% Avertin  
248 anesthesia (2,2,2-tribromoethanol and tert-amyl alcohol in 0.9% NaCl; 0.025 ml/g body  
249 weight), then perfused transcardially with 0.9% NaCl (37°C), followed by 100 mL of ice-  
250 cold 4% paraformaldehyde in phosphate buffer (PFA/PB). Immediately after perfusion,  
251 we dissected the brains, post fixed in 4% PFA/PB overnight at 4°C and cryoprotected in  
252 30% sucrose/PB for 48 hr. Thirty  $\mu$ m coronal sections containing the regions of interest

253 (central amygdala and/or parabrachial nucleus) were collected in 0.1 M phosphate  
254 buffered saline (PBS), pH 7.4 containing 0.01% sodium azide (Sigma) using a freezing  
255 sliding microtome. Sections were stored in 0.1 M PBS, pH 7.4 containing 0.01% sodium  
256 azide (Sigma) at 4°C until used for immunostaining. After rinsing in PBS, sections were  
257 incubated in 0.1% Triton X-100 in PBS for 10 min at room temperature and were then  
258 blocked in 5% normal goat serum (NGS) (Vector Labs, Burlingame, CA) with 0.1% Triton  
259 X-100, 0.05% Tween-20 and 1% bovine serum albumin (BSA) for 30 min at room  
260 temperature. Primary antibody incubations were for overnight or 72 hr at 4°C, followed by  
261 1 hr at room temperature. Sections were then rinsed in PBS and incubated in secondary  
262 antibodies in 1.5% NGS blocking solution with 0.1% Triton X-100, 0.05% Tween 20 and  
263 1% BSA, protected from light, for 2 hr at room temperature. Sections were then rinsed in  
264 PBS, mounted on positively charged glass slides and air-dried overnight. Coverslips were  
265 placed using DAPI Fluoromount-G mounting media (Southern Biotech) and slides were  
266 stored at room temperature overnight and then stored under 4°C.

#### 267 *Verification of brain injection sites for behavioral experiments*

268 For injection site verification, the following primary and secondary antibodies were used:  
269 rat anti-mCherry (1:250 for 72 hr or 1:125 overnight, Invitrogen, M11217), chicken anti-  
270 GFP (1:1000 for 72 hr or 1:500 for overnight, Invitrogen, ab13970), rabbit anti- $\beta$ -gal  
271 (1:1000, Millipore Sigma, ab986 for 72 hr or 1:500 overnight) and goat anti-rat Cy3 (1:250,  
272 Invitrogen, A10522), Alexa Fluor 647-conjugated goat anti-rabbit (1:500, Invitrogen,  
273 A21244) and/or Alexa Fluor 488-conjugated goat anti-chicken IgY (H+L) (1:1000,  
274 Invitrogen, A-11039). Correct injection sites were defined as brains with mCherry+ cells

275 localized to the PBN and mCherry+ terminals and LacZ transduced cell bodies localized  
276 to the CeA.

### 277 *Fos monitoring*

278 For Fos experiments to validate CNO-mediated activation of neurons expressing hM3dq,  
279 mice were habituated for 1 hr in a behavioral room with red lights. Mice then received i.p.  
280 injection of either CNO (3 mg/kg) or saline and were immediately returned to their cages.  
281 30-35 minutes after saline or CNO i.p. injections, animals were then anesthetized with  
282 1.25% Avertin i.p. (0.4 mg/g) injection and perfused as previously described. For pinch-  
283 induced Fos experiments, pinch pressure for withdrawal was recorded at 1-minute  
284 intervals for 30 minutes in male and female mice. Mice were then euthanized and  
285 perfused as described above 1 hr after the completion of the Randall-Selitto test. For both  
286 Fos experiments, the following primary antibodies were used: rat anti-mCherry (1:250 for  
287 72 hr or 1:125 overnight, Invitrogen, M11217) and rabbit anti-Phospho-Fos (Ser32)  
288 (1:2000 for 72 hr or 1:1000 overnight, Cell Signaling Technology, #5348). For secondary  
289 antibodies: goat anti-rat Cy3 (1:250, Invitrogen, A10522) and Alexa Fluor 647-conjugated  
290 goat anti-rabbit (1:500, Invitrogen, A21244) were used.

291

### 292 **Immunohistochemistry to verify injection sites for electrophysiological** 293 **experiments**

294 Slices were fixed in 4% PFA at 4 °C for 48 hr at the end of recordings. Following slice  
295 fixation, slices containing the CeA and PBN were stored in 0.1% sodium azide in PBS 4  
296 °C until histological processing. Slices were rinsed in 0.1 M PBS and incubated in 0.1%  
297 Triton-X-100 in PBS for 10 min at room temperature. 5% NGS-based blocking buffer



298 (0.1% Triton-X-100, 0.05% Tween-20, and 1% BSA) was used for slice incubation at room  
299 temperature for 30 minutes. Slices were then rinsed in PBS and incubated in 1.5% NGS-  
300 based blocking buffer (0.1% Triton-X-100, 0.05% Tween-20, and 1% BSA) containing  
301 the primary antibody rabbit anti-GFP (Invitrogen, A6455, 1:250 concentration) for 1 week  
302 at 4 °C followed by 1 hr at room temperature. Slices were then rinsed in PBS and  
303 incubated in 1.5% NGS-based blocking buffer (0.1% Triton-X-100, 0.05% Tween-20, 1%  
304 BSA) containing the secondary antibody goat anti-Rabbit IgG (H+L) Highly Cross-  
305 Adsorbed (Alexa Fluor 488, Invitrogen A11034, 1:100 concentration) overnight at room  
306 temperature under minimal light. Following secondary antibody incubation, slices were  
307 rinsed in PBS and incubated for 10 min in a series of increasing concentrations of 2,2'-  
308 thiodiethanol (TDE, Sigma) to allow for tissue clearing prior to image acquisition [22] in  
309 the following order of concentrations of TDE in PBS: 10%, 30%, 60%, and 80% followed  
310 by a 2-hr incubation in 97% TDE solution. All slice incubations in TDE were at room  
311 temperature. Slices were mounted on positively charged glass slides, coverslips were  
312 placed on slices covered with 97% TDE, and slides were sealed with either clear nail  
313 polish or Fluoromount-G mounting media (SouthernBiotech).

314 For optogenetic assisted circuit mapping, correct injection sites were defined as brains  
315 with localized GFP-expressing cell bodies at the PBN and GFP+ terminals at the CeA.  
316 For electrophysiological experiments to validate intersectional approach, correct injection  
317 sites were defined as brains with GFP-expressing transduced cells at the CeA, mCherry+  
318 transduced cells at the PBN and mCherry-expressing terminals at the CeA.

319

## 320 **Image acquisition and analysis**

321 Images were acquired using a Nikon A1R laser scanning confocal microscope or a Leica  
322 DM5500 using a 2X (for low magnification) or a 10X (for high magnification) objective.  
323 40X oil-immersion objective was used for high magnification representative images.  
324 Experimenter was blind to experimental group and analyses were performed on images  
325 collected using a 10X objective. GFP, RFP and CY5 channels were used for consecutive  
326 image acquisition, and z stack images were collected at 5.4- $\mu$ m steps. Imaging  
327 parameters (laser intensity, gain, and pinhole) were kept identical between experiments.  
328 NIS Elements software automatically stitched acquired images and converted the stacks  
329 into maximum intensity z-projections. Once images were acquired, rostro-caudal level  
330 and anatomical location of positive cells were determined using distinctive anatomical  
331 landmarks and a mouse brain atlas [23]. Using images taken with a 10x objective, we  
332 identified and mapped injection sites by outlining the regions containing transduced cell  
333 bodies, independently of density of labeled cells. Regions with fluorescent signals without  
334 labeled transduced cell bodies (i.e., areas with labeled processes) were not included in  
335 the outlined region. In some cases, more than one outlined region was included per slice  
336 to accurately depict the regions containing transduced cells.

### 337 *Quantification of positive cells*

338 Quantitative analyses were performed between rostro-caudal levels  $-0.94$  and  $-1.70$   
339 relative to bregma for CeA and between  $-4.96$  and  $-5.34$  relative to bregma for PBN.  
340 Anatomical delineation for each brain region was determined using a mouse brain atlas  
341 [23]. Quantification of positive cells was performed using the NIS Elements software in  
342 each channel on one section per rostro-caudal level per mouse. Labeled and co-labeled  
343 cells were automatically identified with the NIS Elements software and were visually

344 confirmed by an experimenter. To quantify the total number of Fos+ and/or mCherry+  
345 cells throughout the entire rostro-caudal PBN, we systematically selected one slice per  
346 RC level between -4.96 and -5.34 (relative to bregma) for each animal. The number of  
347 positive cells in a total of 4 slices (RC levels: -4.96, -5.02, -5.20, -5.34 relative to bregma)  
348 was quantified and the sum was used as the total number of positive cells per brain. All  
349 steps in this process were performed blind to treatment.

### 350 ***Ex-vivo electrophysiology***

#### 351 *Acute CeA and PBN slice preparations*

352 To confirm the effects of clozapine N-oxide (CNO) on hM4Di-transduced cells in the PBN,  
353 acute PBN slices were prepared from male C57BL/6J mice from 12 to 18 weeks  
354 stereotaxically injected with AAV.hSyn.HI.eGFP-Cre into the CeA and AAV8-hSyn-DIO-  
355 hMD4i-mCherry into the PBN. To validate a functional circuit between the PBN and CeA,  
356 acute CeA slices were prepared from either *Prkcd*-Cre::Ai9 or *Sst*-Cre::Ai9 male mice  
357 (25-26 weeks) injected with rAAV1-hSyn-hChR2(H134R)-EYFP. All electrophysiological  
358 experiments were performed at least 4 weeks after stereotaxic injections to allow for  
359 efficient uptake of retrograde virus in the PBN (for chemogenetic validation experiments)  
360 or efficient expression of ChR2 in PBN terminals in the CeA (for opto-assisted circuit  
361 mapping).

362 Mice were deeply anesthetized with 1.25% Avertin i.p. (0.4 mg/g) and transcardially  
363 perfused with an ice-cold cutting solution including: 110 mM choline chloride, 25 mM  
364 NaHCO<sub>3</sub>, 1.25 mM NaH<sub>2</sub>PO<sub>4</sub>, 2.5 mM KCl, 0.5 mM CaCl<sub>2</sub>, 25 mM D-glucose, 12.7 mM L-  
365 ascorbic acid, and 3.1 mM pyruvic acid. Brains were immediately dissected and  
366 submerged in ice-cold cutting solution. Coronal sections including the right CeA (250 μm)

367 and PBN (300  $\mu\text{m}$ ) were cut using feather carbon steel blades (Ted Pella Inc., Redding,  
368 CA) and a Leica VT1200 S vibrating blade microtome (Leica Microsystems Inc., Buffalo  
369 Grove, IL). CeA and PBN slices were transferred into a recovery chamber of oxygenated  
370 artificial cerebrospinal fluid (ACSF) containing 125 mM NaCl, 2.5 mM KCl, 1.25 mM  
371  $\text{NaH}_2\text{PO}_4$ , 25 mM  $\text{NaHCO}_3$ , 2.0  $\text{CaCl}_2$ , 1.0  $\text{MgCl}_2$ , and 25 mM D-glucose. Slices  
372 recovered for 30 minutes at 33 °C and were then transferred to room temperature for at  
373 least 20 minutes prior to recordings. Cutting solution and ACSF were continuously  
374 saturated with 95%/5%  $\text{O}_2/\text{CO}_2$ .

### 375 *Electrophysiological Recordings*

376 Whole-cell, patch-clamp recordings of neurons located in either the PBN or CeA were  
377 collected at  $33 \pm 1$  °C. The recording chamber was perfused with oxygenated ACSF  
378 (95%/5%  $\text{O}_2/\text{CO}_2$ ) at a flow rate of 1 mL/min. An in-line solution heater and heated  
379 recording chamber (Warner Instruments) monitored and controlled the temperature  
380 conditions throughout the recordings. Neurons were identified through differential  
381 interference contrast optics and fluorescent microscopy using an upright telescope (Nikon  
382 Eclipse FN1). Recording pipettes (2.5-5 M $\Omega$  resistance for CeA and 4-7 M $\Omega$  resistance  
383 for PBN) were filled with a potassium methyl sulfate-based internal solution (120 mM  
384  $\text{KMeSO}_4$ , 20 mM KCl, 10 mM HEPES, 0.2 mM EGTA, 8 mM NaCl, 4 mM Mg-ATP, 0.3  
385 Tris-GTP, and 14 mM phosphocreatine, with pH adjusted to 7.3 with KOH (approximately  
386 300 mosmol-1). Recordings were performed using a Multiclamp 700B patch-clamp  
387 amplifier interfaced with a Digidata 1550 acquisition system and pCLAMP 10.7 software  
388 (Molecular Devices) installed on a Dell computer.

### 389 *Channelrhodopsin-2 (ChR2)-assisted circuit mapping*

390 Optically evoked excitatory postsynaptic currents (oEPSCs) of tdTomato-expressing  
391 PKC $\delta$ <sup>+</sup> or Som<sup>+</sup> CeA neurons were recorded at a holding potential of -70 mV, and a  
392 single light pulse of 10 ms duration, delivered at 10 Hz, was presented to elicit oEPSCs.  
393 Signals were filtered at 10 kHz and acquired at 100 kHz. A blue LED illumination system  
394 ( $\lambda = 470$  nm, Mightex) was used to stimulate PBN-projecting terminals within the CeA. An  
395 optical power console and sensor (Thorlabs) measured the blue light output directly  
396 through the 40x objective of the microscope prior to each experiment, and the intensity  
397 output measured between 10-12 mW. Prior to formation of membrane to pipette seals  
398 ( $\sim 1$  G $\Omega$ ), tip potentials were zeroed. Additionally, the pipette capacitances were  
399 compensated and series resistances (not exceeding 20 M $\Omega$ ) were repeatedly monitored  
400 throughout the duration of the recording. Whole-cell capacitance recordings under the  
401 voltage-clamp configuration were collected at a holding potential of -70mV and then  
402 presented a  $\pm 10$  mV voltage change of 25-ms duration. Under current-clamp  
403 configuration, 500 ms depolarizing current injections of 220 and 280 pA amplitudes were  
404 used to elicit repetitive action potential firing. Cells that categorized as late-firing or  
405 regular-spiking based on their latencies to fire in response to prolonged depolarizing  
406 current injections, as previously defined [24]. Briefly, regular-spiking (RS) neurons are  
407 categorized if the latency to the first spike is shorter than 100 ms and late-firing [25]  
408 neurons are categorized if the latency to the first spike is longer than 100 ms. Spike  
409 latency for RS and LF cells were assessed in response to 220-pA current step for Som<sup>+</sup>  
410 neurons and in response to 280-pA current step for PKC $\delta$ <sup>+</sup> neurons, which elicited an  
411 average of 10 spikes in recorded neurons. Current clamp signaling was filtered at 10 kHz

412 and acquired at 100 kHz. The anatomical location of each CeA neuron recorded was  
413 determined using a mouse brain atlas [23].

#### 414 *CeA-projecting PBN neurons recordings and analysis*

415 Animals that received concurrent intra-amygdala injection of Retrobeads™ and  
416 sciatic nerve cuff or sham surgery were sacrificed 7 to 10 days after surgery. 300 μm  
417 coronal sections containing the right PBN were prepared as described above and allowed  
418 to recover in room temperature ACSF for 1 hr prior to recordings. Fluorescently beaded  
419 neurons were then targeted for recordings.

420 Capacitance and input resistance were calculated from a  $-70 \text{ mV} \pm 10 \text{ mV}$  step in  
421 voltage clamp. Cells were classified as spontaneous if they fired action potentials while  
422 being held at 0 pA. Spontaneous firing frequency was calculated using a 1-minute period  
423 of stable firing in current clamp. A series of 500 ms depolarizing current steps ( $\Delta 5 \text{ pA}$ )  
424 were then used to assess firing type and determine the input-frequency relationship. Non-  
425 spontaneous (quiescent) cells were classified according to their spike latency to an 80-  
426 pA step. Regular spiking neurons had an initial spike latency of less than 20 ms, whereas  
427 late firing neurons had an initial spike latency of more than 80 ms. Reluctantly-firing  
428 neurons had a rheobase higher than 80 pA, with rheobase defined as the lowest  
429 depolarizing current injection amplitude that elicited an action potential. Low-threshold  
430 bursting neurons fired a train of action potentials and remained silent after that initial burst  
431 across the entire span of current steps (5-200 pA).

#### 432 *Electrophysiological validation of chemogenetic approach*

433 Current-clamp recordings were performed on hM4Di-transduced PBN cells to assess  
434 neuronal excitability before and after CNO bath application. All recordings were  
435 performed in ACSF with the addition of synaptic blockers (5  $\mu$ M CPP ( $\alpha$ -((R)-2-  
436 carboxypiperazin-4-yl)-propyl-1-phosphonic acid), 10  $\mu$ M NBQX (2,3-dioxo-6-nitro-  
437 1,2,3,4-tetrahydrobenzo[f]quinoxaline-7-sulfonamide) and 5  $\mu$ M GABAazine (6-imino-3-(4-  
438 methoxyphenyl)-1(6H) pyridazinebutanoic acid hydrobromide). PBN cells expressing  
439 mCherry were visually identified and targeted, and series resistances of assessed  
440 neurons did not exceed 20 M $\Omega$ . To account for the heterogenous firing phenotypes  
441 observed within the PBN (i.e. spontaneously active, low threshold, regular-spiking, or late-  
442 firing neurons), current clamp protocols were conducted respective to the firing properties.  
443 Spontaneously active neurons were recorded continuously for 20 min, while low threshold  
444 neurons were recorded using an 800-ms depolarizing current ramp protocol. Action  
445 potential firing in regular-spiking or late-firing PBN neurons were recorded in response to  
446 a 500-ms square pulse depolarizing current injections. Current injection amplitudes that  
447 elicit between 2-5 stable action potentials were used every 15 s. At least 5 stable  
448 recordings were obtained prior to bath application of either 10  $\mu$ M CNO or vehicle (i.e.  
449 saline) in ACSF. The number of elicited action potentials during each condition were  
450 averaged across 5 traces to assess the effect of CNO on excitability. Current clamp  
451 signals were acquired at 100 kHz and filtered at 10 kHz.

452

### 453 **Statistical analysis**

454 Data are presented as mean  $\pm$  SEM. Statistical analysis was performed using unpaired  
455 or paired two tailed t test, or two-way analysis of variance (ANOVA) followed by Tukey's

456 multiple comparison tests using Graph Pad Prism version 9.0. The significance level was  
457 set at  $p < 0.05$ . Sample sizes and  $p$  values are described in each figure legend. Detailed  
458 information on each statistical test performed are shown in **Table S1**.

459

- 460 1 Wilson TD, Valdivia S, Khan A, Ahn HS, Adke AP, Martinez Gonzalez S, et al.  
461 Dual and Opposing Functions of the Central Amygdala in the Modulation of Pain.  
462 *Cell Rep.* 2019;29(2):332-46 e5.
- 463 2 Taniguchi H, He M, Wu P, Kim S, Paik R, Sugino K, et al. A resource of Cre  
464 driver lines for genetic targeting of GABAergic neurons in cerebral cortex.  
465 *Neuron.* 2011;71(6):995-1013.
- 466 3 Hurst JL, West RS. Taming anxiety in laboratory mice. *Nat Methods.*  
467 2010;7(10):825-6.
- 468 4 Carrasquillo Y, Gereau RWt. Hemispheric lateralization of a molecular signal for  
469 pain modulation in the amygdala. *Mol Pain.* 2008;4:24.
- 470 5 Ji G, Neugebauer V. Hemispheric lateralization of pain processing by amygdala  
471 neurons. *J Neurophysiol.* 2009;102(4):2253-64.
- 472 6 Allen HN, Bobnar HJ, Kolber BJ. Left and right hemispheric lateralization of the  
473 amygdala in pain. *Prog Neurobiol.* 2021;196:101891.
- 474 7 Allen HN, Chaudhry S, Hong VM, Lewter LA, Sinha GP, Carrasquillo Y, et al. A  
475 Parabrachial-to-Amygdala Circuit That Determines Hemispheric Lateralization of  
476 Somatosensory Processing. *Biol Psychiatry.* 2023;93(4):370-81.
- 477 8 Wahlsten D, Hudspeth WJ, Bernhardt K. Implications of genetic variation in  
478 mouse brain structure for electrode placement by stereotaxic surgery. *J Comp*  
479 *Neurol.* 1975;162(4):519-31.
- 480 9 Yalcin I, Megat S, Barthas F, Waltisperger E, Kremer M, Salvat E, et al. The  
481 sciatic nerve cuffing model of neuropathic pain in mice. *J Vis Exp.* 2014(89).
- 482 10 Benbouzid M, Pallage V, Rajalu M, Waltisperger E, Doridot S, Poisbeau P, et al.  
483 Sciatic nerve cuffing in mice: a model of sustained neuropathic pain. *Eur J Pain.*  
484 2008;12(5):591-9.
- 485 11 Carrasquillo Y, Gereau IV RW. Activation of the extracellular signal-regulated  
486 kinase in the amygdala modulates pain perception. *J Neurosci.* 2007;27(7):1543-  
487 51.
- 488 12 Yoon C, Wook YY, Sik NH, Ho KS, Mo CJ. Behavioral signs of ongoing pain and  
489 cold allodynia in a rat model of neuropathic pain. *Pain.* 1994;59(3):369-76.
- 490 13 Colburn RW, Lubin ML, Stone DJ, Jr., Wang Y, Lawrence D, D'Andrea MR, et al.  
491 Attenuated cold sensitivity in TRPM8 null mice. *Neuron.* 2007;54(3):379-86.
- 492 14 Hargreaves K, Dubner R, Brown F, Flores C, Joris J. A new and sensitive  
493 method for measuring thermal nociception in cutaneous hyperalgesia. *Pain.*  
494 1988;32(1):77-88.
- 495 15 Carrasquillo Y, Gereau RWt. Activation of the extracellular signal-regulated  
496 kinase in the amygdala modulates pain perception. *J Neurosci.* 2007;27(7):1543-  
497 51.



- 498 16 Randall LO, Selitto JJ. A method for measurement of analgesic activity on  
499 inflamed tissue. *Arch Int Pharmacodyn Ther.* 1957;111(4):409-19.
- 500 17 Minett MS, Eijkelkamp N, Wood JN. Significant determinants of mouse pain  
501 behaviour. *PLoS One.* 2014;9(8):e104458.
- 502 18 Deuis JR, Dvorakova LS, Vetter I. Methods Used to Evaluate Pain Behaviors in  
503 Rodents. *Front Mol Neurosci.* 2017;10:284.
- 504 19 Santos-Nogueira E, Redondo Castro E, Mancuso R, Navarro X. Randall-Selitto  
505 test: a new approach for the detection of neuropathic pain after spinal cord injury.  
506 *J Neurotrauma.* 2012;29(5):898-904.
- 507 20 Minett MS, Quick K, Wood JN. Behavioral Measures of Pain Thresholds. *Curr*  
508 *Protoc Mouse Biol.* 2011;1(3):383-412.
- 509 21 Anseloni VC, Ennis M, Lidow MS. Optimization of the mechanical nociceptive  
510 threshold testing with the Randall-Selitto assay. *J Neurosci Methods.*  
511 2003;131(1-2):93-7.
- 512 22 Costantini I, Ghobril JP, Di Giovanna AP, Allegra Mascaro AL, Silvestri L,  
513 Mullenbroich MC, et al. A versatile clearing agent for multi-modal brain imaging.  
514 *Sci Rep.* 2015;5:9808.
- 515 23 Franklin KBJ, Paxinos G. Paxinos and Franklin's The mouse brain in stereotaxic  
516 coordinates. Fourth edition. ed. Academic Press, an imprint of Elsevier:  
517 Amsterdam; 2013.
- 518 24 Adke AP, Khan A, Ahn HS, Becker JJ, Wilson TD, Valdivia S, et al. Cell-Type  
519 Specificity of Neuronal Excitability and Morphology in the Central Amygdala.  
520 *eNeuro.* 2021;8(1).
- 521 25 Woolf CJ, Salter MW. Neuronal plasticity: increasing the gain in pain. *Science.*  
522 2000;288(5472):1765-9.

523

524

525

526

527

528

529

530

531

532

533

534

535
